# Supplementary material for: Comparative study of the genomic landscape and tumor microenvironment among large cell carcinoma of the lung, large cell neuroendocrine of the lung, and small cell lung cancer
Source: PubMed Central journal article supplement — Medicine (Baltimore). 2023 Jan 27;102(4):e32781. doi: 10.1097/MD.0000000000032781 (PMC9876020; doi:10.1097/md.0000000000032781), 2023-01-27
Supplement: medi-102-e32781-s001.pdf [file medi-102-e32781-s001.pdf]

**Table S1 Clinicopathological characteristics of patients**

|                             | <b>Overall</b>  | <b>LCC</b>      | <b>LCNEC</b>    | <b>SCLC</b>     | <b>P-value</b> |
|-----------------------------|-----------------|-----------------|-----------------|-----------------|----------------|
|                             | <b>(n = 40)</b> | <b>(n = 10)</b> | <b>(n = 12)</b> | <b>(n = 18)</b> |                |
| <b>Age (years)</b>          |                 |                 |                 |                 | 0.246          |
| Median, range               | 63 (46-80)      | 66 (47-80)      | 63 (46-77)      | 61 (47-71)      |                |
| <b>Gender [n (%)]</b>       |                 |                 |                 |                 | 0.192          |
| Female                      | 5 (12.5)        | 3 (30.0)        | 1 (8.3)         | 1 (5.6)         |                |
| Male                        | 34 (85.0)       | 7 (70.0)        | 10 (83.3)       | 17 (94.4)       |                |
| Unknown                     | 1 (2.5)         | 0 (0.0)         | 1 (8.3)         | 0 (0.0)         |                |
| <b>Tumor stage [n (%)]</b>  |                 |                 |                 |                 | 0.254          |
| Stage I                     | 14 (35.0)       | 6 (60.0)        | 1 (8.3)         | 7 (38.9)        |                |
| Stage II                    | 10 (25.0)       | 2 (20.0)        | 3 (25.0)        | 5 (27.8)        |                |
| Stage IIIA                  | 12 (30.0)       | 2 (20.0)        | 6 (50.0)        | 4 (2.2)         |                |
| Stage IV                    | 1 (2.5)         | 0 (0.0)         | 1 (8.3)         | 0 (0.0)         |                |
| Missing                     | 3 (7.5)         | 0 (0.0)         | 1 (8.3)         | 2 (1.1)         |                |
| <b>Ki-67 expression (%)</b> |                 |                 |                 |                 | 0.1152         |
| Median (range)              | 70 (20-95)      | 60 (25-80)      | 60 (20-95)      | 80 (50-90)      |                |
| Unknown [n, (%)]            | 2 (5.0)         | 0 (0.0)         | 2 (16.7)        | 0 (0.0)         |                |

LCC: large cell carcinoma; LCNEC: large cell neuroendocrine carcinoma; SCLC: small cell lung cancer.
