# Supplementary material for: Comparative study of the genomic landscape and tumor microenvironment among large cell carcinoma of the lung, large cell neuroendocrine of the lung, and small cell lung cancer
Source: PubMed Central journal article supplement — Medicine (Baltimore). 2023 Jan 27;102(4):e32781. doi: 10.1097/MD.0000000000032781 (PMC9876020; doi:10.1097/md.0000000000032781), 2023-01-27
Supplement: medi-102-e32781-s002.pdf [file medi-102-e32781-s002.pdf]

**Table S2 The survival of patients in different groups**

| <b>Histological subtype</b> | <b>Groups</b>                                                       | <b>mOS (days)</b>     | <b>P-value</b> |
|-----------------------------|---------------------------------------------------------------------|-----------------------|----------------|
| LCNEC (Figure 6A)           | CD3 <sup>+</sup> CD8 <sup>+</sup> iTILs presence <i>vs.</i> absence | 1309 <i>vs.</i> 272.5 | 0.0124         |
| LCNEC (Figure 6B)           | CD163 <sup>+</sup> iTILs high <i>vs.</i> low                        | 1422 <i>vs.</i> 365   | 0.0638         |
| LCNEC (Figure 6C)           | CD163 <sup>+</sup> sTILs high <i>vs.</i> low                        | 1422 <i>vs.</i> 420   | 0.0550         |
| SCLC (Figure 7A)            | CD8 <sup>+</sup> sTILs high <i>vs.</i> low                          | NR <i>vs.</i> 548     | 0.0046         |
| SCLC (Figure 7B)            | CD3 <sup>+</sup> CD8 <sup>+</sup> sTILs high <i>vs.</i> low         | NR <i>vs.</i> 548     | 0.0845         |
| LCNEC (Figure 8A)           | CD3 <sup>+</sup> CD8 <sup>+</sup> index high <i>vs.</i> low         | 1411 <i>vs.</i> 392.5 | 0.0340         |
| SCLC (Figure 8B)            | CD68 <sup>+</sup> CD163 <sup>+</sup> index high <i>vs.</i> low      | 548 <i>vs.</i> NR     | 0.0410         |
| SCLC (Figure 8C)            | CD163 <sup>+</sup> index high <i>vs.</i> low                        | 548 <i>vs.</i> NR     | 0.0410         |

iTILs: iTILs within cancer cell nests; sTILs: iTILs in cancer stroma; OS: overall survival; LCNEC: large cell neuroendocrine carcinoma; SCLC: small cell lung cancer; iTILs/sTILs index = the positive rate of iTILs/the positive rate of sTILs; NR, not reached; CD: cell differentiation.
